# Supplementary material
Source: MDPI journal article supplement (https://www.mdpi.com/2072-4292/11/21/2566)
Supplement: s1 [file s1]

Note:

The Editorial Office would like to update the paper by removing the short title “(Short Title: Vegetation Structure from LiDAR and Multiangular Data)”.

We apologize for any inconvenience caused to the readers.
